# Supplementary material for: Association of Childhood Social-Emotional Functioning Profiles at School Entry With Early-Onset Mental Health Conditions
Source: PubMed Central journal article supplement (PMC6324314; doi:10.1001/jamanetworkopen.2018.6694), 2019-01-04
Supplement: jamanetwopen-2-e186694-s001.pdf [file jamanetwopen-2-e186694-s001.pdf]

## Supplementary Online Content

Thomson KC, Richardson CG, Gadermann AM, Emerson SD, Shoveller J, Guhn M. Association of childhood social-emotional functioning profiles at school entry with early-onset mental health conditions. *JAMA Netw Open*. 2019;2(1):e186694. doi:10.1001/jamanetworkopen.2018.6694

**eTable 1.** Latent Profile Analysis Model Fit Comparison: Social-Emotional Functioning Among Kindergarten Children in British Columbia, Canada

**eTable 2.** Standardized Mean Scores (and SDs) for Early Development Instrument Social-Emotional Subscales by Latent Profile Group

This supplementary material has been provided by the authors to give readers additional information about their work.

**eTable 1.** Latent Profile Analysis Model Fit Comparison: Social-Emotional Functioning Among Kindergarten Children in British Columbia, Canada (N = 34,323)

| Number of Latent Profiles | Log Likelihood Value | aBIC      | Entropy | BLRT | Lowest Class Probability | Smallest Class Size | Smallest Class Proportion |
|---------------------------|----------------------|-----------|---------|------|--------------------------|---------------------|---------------------------|
| 1                         | -382412.71           | 764941.66 | NA      | NA   | 1                        | 34323               | 1                         |
| 2                         | -327988.96           | 656159.56 | 0.95    | 0.00 | 0.97                     | 8307                | 0.24                      |
| 3                         | -311943.74           | 624134.52 | 0.93    | 0.00 | 0.93                     | 3081                | 0.09                      |
| 4                         | -304171.75           | 608655.92 | 0.90    | 0.00 | 0.86                     | 1824                | 0.05                      |
| 5                         | -297795.87           | 595969.55 | 0.91    | 0.00 | 0.87                     | 1506                | 0.04                      |
| 6                         | -291595.94           | 583635.07 | 0.94    | 0.00 | 0.90                     | 963                 | 0.03                      |
| 7                         | -288058.93           | 576626.46 | 0.94    | 0.00 | 0.89                     | 581                 | 0.02                      |
| 8                         | -284930.45           | 570434.88 | 0.91    | 0.00 | 0.78                     | 496                 | 0.01                      |
| 9                         | -281664.14           | 563967.65 | 0.93    | 0.00 | 0.82                     | 467                 | 0.01                      |
| 10                        | -279379.12           | 559463.00 | 0.93    | 0.02 | 0.79                     | 442                 | 0.01                      |

**eTable 2.** Standardized Mean Scores (and SDs) for Early Development Instrument Social-Emotional Subscales by Latent Profile Group (N = 34,323)

| Latent Profile Group | EDI Social-Emotional Subscales <sup>a</sup> |                          |                        |                      |                     |                                |                         |                                        |
|----------------------|---------------------------------------------|--------------------------|------------------------|----------------------|---------------------|--------------------------------|-------------------------|----------------------------------------|
|                      | Overall Social Competence                   | Responsibility & Respect | Approaches to Learning | Readiness to Explore | Prosocial & Helping | Anxious & Fearful <sup>b</sup> | Aggressive <sup>b</sup> | Hyperactive & Inattentive <sup>b</sup> |
| 1                    | .58 (.58)                                   | .60 (.25)                | .60 (.43)              | .45 (.31)            | .45 (.83)           | .30 (.69)                      | .42 (.29)               | .52 (.42)                              |
| 2                    | -.42 (.86)                                  | .36 (.43)                | -.15 (.76)             | -1.79 (.70)          | -.57 (.85)          | -.64 (1.26)                    | .40 (.31)               | .29 (.59)                              |
| 3                    | -.47 (.71)                                  | -.51 (.61)               | -.55 (.71)             | .25 (.47)            | -.32 (.82)          | -.11 (1.00)                    | -.10 (.62)              | -.55 (.82)                             |
| 4                    | -1.44 (.75)                                 | -1.49 (.68)              | -1.71 (.79)            | -2.23 (.91)          | -1.12 (.74)         | -.83 (1.38)                    | -.38 (.82)              | -.97 (1.01)                            |
| 5                    | -1.00 (.70)                                 | -1.56 (.56)              | -.95 (.77)             | .16 (.56)            | -.74 (.80)          | -.26 (1.05)                    | -1.91 (.96)             | -1.40 (.94)                            |
| 6                    | -2.08 (.62)                                 | -2.87 (.76)              | -2.31 (.76)            | -1.29 (1.29)         | -1.39 (.59)         | -1.08 (1.35)                   | -3.31(1.31)             | -2.54 (.79)                            |

<sup>a</sup>For each item, teachers rated a student’s behavior currently or within the past 6 months as “never or not true” (score of 0), “sometimes or somewhat true” (score 5), or “often or very true” (score of 10). “Don’t know” was coded as missing. Scores for each subscale item were summed and divided by the number of items in the subscale to derive a subscale mean which was then z-standardized within the sample. Negatively worded items were reverse-coded for the anxious and fearful, aggressive, and hyperactive and inattentive subscales so that higher scores indicated better social-emotional functioning (used for the other positively worded subscales). This EDI scoring was developed in consultation with educators and community audiences without prior clinical or research background for ease of interpretation and dissemination of findings.

<sup>b</sup>Reverse coded.
